# Supplementary material for: Increasing Prevalence of HIV-1 Transmitted Drug Resistance in Portugal: Implications for First Line Treatment Recommendations
Source: PubMed Central journal article supplement (PMC7693025; doi:10.3390/v12111238), 2020-10-30
Supplement: viruses-12-01238-s001.pdf [file viruses-12-01238-s001.pdf]

## **Additional File 1**

**Title:** Increasing prevalence of HIV-1 Transmitted Drug Resistance in Portugal: implications for first line treatment recommendations

### **Statistical Analysis**

In the univariate analysis of factors associated with HIV drug resistance the following covariates were separately included: sex, age at diagnosis, risk groups, geographic region of origin, subtype, CD4 value and viral load. Factors significantly associated with TDR in a univariate analysis ( $p < 0.05$ ), factors with a p value less than 0.2<sup>1</sup> and factors considered with biologic value (sex and age at diagnosis) were included into multiple logistic regression.

Patterns of TDR, ADR and for the prevalence of mutations over time were calculated by logistic regression, using R 3.5.1. For TDR, ADR and mutations the logistic regression model was calculated for each class of resistance, with Odds Ratio (OR) and 95% confidence intervals (CI). Results were considered statistically significant when p-values were below 0.05.

---

<sup>1</sup> Harrel, F. E., 2010. Regression Modelling Strategies: with applications to linear models, logistic regression, and survival analysis, Springer series in statistic. Springer, New York.

**Table S1-** Trends of transmitted and acquired drug resistance between 2014 and 2017. NRTI, Nucleotide reverse transcriptase inhibitors; NNRTI, Non-nucleotide reverse transcriptase inhibitors; PI, Protease inhibitors; CI, confidence interval; OR, odds ratio.

| <b>Years</b>         | <b>Transmitted drug resistance (TDR)</b> | <b>OR (95% CI)</b>  | <b>p for trend</b> |
|----------------------|------------------------------------------|---------------------|--------------------|
| <b>2014-2017</b>     | Any DRMs                                 | 1.169 (1.042-1.311) | 0.008              |
|                      | NRTI resistance                          | 1.337(1.127-1.587)  | 0.001              |
|                      | NNRTI resistance                         | 1.132 (1.003-1.278) | 0.044              |
|                      | PI resistance                            | 0.943 (0.760-1.170) | 0.595              |
|                      | Single class resistance                  | 1.111 (0.972-1.269) | 0.122              |
|                      | Dual classes resistance                  | 1.251 (1.003-1.561) | 0.047              |
|                      | PI + NRTI resistance                     | 1.019 (0.560-1.855) | 0.950              |
|                      | PI + NNRTI resistance                    | 1.511 (0.636-3.590) | 0.350              |
|                      | NRTI+NNRTI resistance                    | 1.270 (0.992-1.626) | 0.058              |
|                      | Triple class resistance                  | 1.361 (0.728-2.546) | 0.334              |
| <b>Years</b>         | <b>Acquired drug resistance (ADR)</b>    | <b>OR (95% CI)</b>  | <b>p for trend</b> |
| <b>Sep 2014-2017</b> | Any DRMs                                 | 0.983 (0.839-1.153) | 0.837              |
|                      | NRTI resistance                          | 0.987 (0.838-1.162) | 0.874              |
|                      | NNRTI resistance                         | 0.985 (0.836-1.160) | 0.852              |
|                      | PI resistance                            | 0.945 (0.729-1.225) | 0.669              |
|                      | Single class resistance                  | 1.057 (0.869-1.286) | 0.580              |
|                      | Dual classes resistance                  | 0.908 (0.756-1.089) | 0.298              |
|                      | PI + NRTI resistance                     | 0.831 (0.532-1.296) | 0.413              |
|                      | PI + NNRTI resistance                    | 1.754 (0.202-2.813) | 0.674              |
|                      | NRTI+NNRTI resistance                    | 0.936 (0.772-1.135) | 0.503              |
|                      | Triple class resistance                  | 1.122 (0.775-1.623) | 0.542              |

**Table S2-** Proportion of transmitted drug resistance and of acquired drug resistance for single, double and triple classes and for associations of drug classes between 2001 and 2017. NRTI, Nucleotide reverse transcriptase inhibitors; NNRTI, Non-nucleotide reverse transcriptase inhibitors; PI, Protease inhibitors; CI, confidence interval; OR, odds ratio.

|      | ART-Naive patients     |                        |                        |                        |                   |                    | ART-Experienced patients |                        |                        |                       |                   |                    |
|------|------------------------|------------------------|------------------------|------------------------|-------------------|--------------------|--------------------------|------------------------|------------------------|-----------------------|-------------------|--------------------|
|      | Single class<br>(n; %) | Double Class<br>(n; %) | Triple Class<br>(n; %) | NRTI + NNRTI<br>(n; %) | NRTI+PI<br>(n; %) | NNRTI+PI<br>(n; %) | Single class<br>(n; %)   | Double Class<br>(n; %) | Triple Class<br>(n; %) | NRTI+ NNRTI<br>(n; %) | NRTI+PI<br>(n; %) | NNRTI+PI<br>(n; %) |
| 2001 | 4 (8.9)                | 5 (11.1)               | 3 (6.7)                | 2 (4.4)                | 2 (4.4)           | 1 (2.2)            | 35 (44.6)                | 109 (48.7)             | 50 (22.3)              | 42 (18.8)             | 65 (29.0)         | 2 (0.9)            |
| 2002 | 4 (5.7)                | 2 (2.9)                | 0 (0.0)                | 0 (0.0)                | 2 (2.9)           | 0 (0.0)            | 70 (20.3)                | 155 (44.9)             | 78 (22.6)              | 57 (16.5)             | 97 (28.1)         | 1 (0.3)            |
| 2003 | 11 (4.4)               | 7 (2.8)                | 2 (0.8)                | 2 (0.8)                | 5 (2.0)           | 0 (0.0)            | 53 (18.8)                | 148 (52.4)             | 45 (16.0)              | 97 (34.4)             | 47 (16.7)         | 4 (1.4)            |
| 2004 | 7 (4.5)                | 3 (1.9)                | 0 (0.0)                | 1 (0.6)                | 2 (1.3)           | 0 (0.0)            | 83 (21.4)                | 208 (53.7)             | 41 (10.6)              | 143 (37.0)            | 62 (16.0)         | 3 (0.8)            |
| 2005 | 10 (7.6)               | 6 (4.5)                | 1 (0.8)                | 3 (2.3)                | 3 (2.3)           | 0 (0.0)            | 60 (18.9)                | 142 (44.9)             | 36 (11.4)              | 103 (32.7)            | 37 (11.7)         | 2 (0.6)            |
| 2006 | 9 (4.7)                | 1 (0.5)                | 0 (0.0)                | 0 (0.0)                | 0 (0.0)           | 1 (0.5)            | 63 (17.0)                | 175 (47.2)             | 40 (10.8)              | 135 (36.4)            | 40 (10.8)         | 0 (0.0)            |
| 2007 | 22 (5.2)               | 3 (0.7)                | 0 (0.0)                | 1 (0.2)                | 1 (0.2)           | 1 (0.2)            | 60 (20.2)                | 109 (36.7)             | 25 (8.4)               | 78 (26.3)             | 26 (8.8)          | 5 (1.7)            |
| 2008 | 44 (7.6)               | 9 (1.5)                | 2 (0.3)                | 7 (1.2)                | 0 (0.0)           | 2 (0.3)            | 51 (20.0)                | 72 (28.2)              | 11 (4.3)               | 56 (22.0)             | 15 (5.9)          | 1 (0.4)            |
| 2009 | 38 (6.1)               | 9 (1.5)                | 0 (0.0)                | 6 (1.0)                | 1 (0.2)           | 2 (0.3)            | 71 (23.4)                | 82 (27.1)              | 16 (5.3)               | 66 (21.8)             | 15 (5.0)          | 1 (0.3)            |
| 2010 | 51 (7.9)               | 4 (0.6)                | 1 (0.2)                | 2 (0.3)                | 0 (0.0)           | 2 (0.3)            | 62 (26.1)                | 61 (25.6)              | 6 (2.5)                | 50 (21.6)             | 11(4.6)           | 0 (0.0)            |
| 2011 | 44 (6.7)               | 8 (1.2)                | 0 (0.0)                | 2 (0.3)                | 4 (0.6)           | 2 (0.3)            | 38 (26.0)                | 36 (24.6)              | 6 (4.1)                | 28 (19.2)             | 7 (4.8)           | 1 (0.7)            |
| 2012 | 39 (9.2)               | 3 (0.7)                | 0 (0.0)                | 2 (0.5)                | 0 (0.0)           | 1 (0.2)            | 31 (29.5)                | 30 (28.6)              | 1 (1.0)                | 23 (21.9)             | 6 (5.7)           | 1 (1.0)            |
| 2013 | 53 (9.7)               | 7 (1.3)                | 0 (0.0)                | 5 (0.9)                | 1 (0.2)           | 1 (0.2)            | 22 (22.2)                | 26 (26.3)              | 3 (3.0)                | 21 (21.2)             | 4 (4.0)           | 1 (1.0)            |
| 2014 | 41 (6.9)               | 11 (1.8)               | 0 (0.0)                | 9 (1.5)                | 2 (0.3)           | 0 (0.0)            | 31 (20.9)                | 42 (28.4)              | 5 (3.4)                | 35 (23.6)             | 6 (4.0)           | 1 (0.7)            |

|      |           |          |         |          |         |         |           |           |         |           |         |         |
|------|-----------|----------|---------|----------|---------|---------|-----------|-----------|---------|-----------|---------|---------|
| 2015 | 44 (6.9)  | 16 (2.5) | 2 (0.3) | 13 (2.0) | 2 (0.3) | 1 (0.2) | 23 (18.7) | 30 (24.4) | 9 (7.3) | 25 (20.3) | 5 (4.1) | 0 (0.0) |
| 2016 | 58 (8.1)  | 21 (2.9) | 3 (0.4) | 15 (2.1) | 3 (0.4) | 3 (0.4) | 20 (18.9) | 33 (31.1) | 2 (1.9) | 28 (26.4) | 4 (3.8) | 1 (0.9) |
| 2017 | 56 (10.0) | 23 (3.7) | 3 (0.5) | 20 (3.2) | 2 (0.3) | 1 (0.2) | 25 (24.5) | 20 (19.6) | 7 (6.9) | 18 (17.6) | 2 (2.0) | 0 (0.0) |

**Table S3-** Time trends of selected mutations with prevalence greater than 0.1% for ART-NP and 1.0% for ART-TP. NRTI, Nucleotide reverse transcriptase inhibitors; NNRTI, Non-nucleotide reverse transcriptase inhibitors; PI, Protease inhibitors; CI, confidence interval; OR, odds ratio; ART-NP, Antiretroviral Naïve Patients; ART-EP, Antiretroviral Experience Patients.

| ART-Naïve Patients                                                  |              |             |              |              |              |              |              |              |              |              |              |              |              |              |              |              |              |                        |         |
|---------------------------------------------------------------------|--------------|-------------|--------------|--------------|--------------|--------------|--------------|--------------|--------------|--------------|--------------|--------------|--------------|--------------|--------------|--------------|--------------|------------------------|---------|
|                                                                     | 2001<br>(12) | 2002<br>(6) | 2003<br>(20) | 2004<br>(10) | 2005<br>(17) | 2006<br>(10) | 2007<br>(25) | 2008<br>(55) | 2009<br>(47) | 2010<br>(56) | 2011<br>(52) | 2012<br>(42) | 2013<br>(60) | 2014<br>(52) | 2015<br>(62) | 2016<br>(82) | 2017<br>(82) | OR (95%CI)             | P trend |
| <b>PIs- Protease Inhibitors (n%)</b>                                |              |             |              |              |              |              |              |              |              |              |              |              |              |              |              |              |              |                        |         |
| <b>L90M</b>                                                         | 6<br>(50.0)  | 1<br>(16.7) | 5<br>(25.0)  | 3<br>(30.0)  | 2<br>(11.8)  | 0<br>(0.0%)  | 3<br>(12.0)  | 8<br>(14.5)  | 5<br>(10.6)  | 4<br>(7.1)   | 10<br>(19.2) | 3<br>(7.1)   | 7<br>(11.7)  | 6<br>(11.5)  | 7<br>(11.3)  | 10<br>(12.2) | 5<br>(6.1)   | 0.922<br>(0.875-0.971) | 0.002   |
| <b>M46IL</b>                                                        | 1<br>(8.3)   | 1<br>(16.7) | 3<br>(15.0)  | 1<br>(10.0)  | 3<br>(17.6)  | 1<br>(10.0)  | 1<br>(4.0)   | 4<br>(7.3)   | 3<br>(6.4)   | 8<br>(14.3)  | 5<br>(9.6)   | 2<br>(4.8)   | 4<br>(6.7)   | 5<br>(9.6)   | 1<br>(1.6%)  | 7<br>(8.5)   | 4<br>(4.9%)  | 0.942<br>(0.884-1.004) | 0.067   |
| <b>NNRTIs- Non-nucleoside reverse transcriptase inhibitors (n%)</b> |              |             |              |              |              |              |              |              |              |              |              |              |              |              |              |              |              |                        |         |
| <b>K103NS</b>                                                       | 5<br>(41.7)  | 0<br>(0.0)  | 3<br>(15.0)  | 5<br>(50.0)  | 5<br>(29.4)  | 4<br>(40.0)  | 9<br>(36.0)  | 18<br>(32.7) | 16<br>(34.0) | 21<br>(37.5) | 11<br>(21.2) | 9<br>(21.4)  | 18<br>(30.0) | 21<br>(40.4) | 20<br>(32.3) | 31<br>(37.8) | 39<br>(47.6) | 1.041<br>(1.002-1.083) | 0.041   |
| <b>G190ASE<br/>Q</b>                                                | 2<br>(16.7)  | 0<br>(0.0)  | 3<br>(15.0)  | 0<br>(0.0)   | 2<br>(11.8)  | 1<br>(10.0)  | 2<br>(8.0)   | 5<br>(9.1)   | 3<br>(6.4)   | 7<br>(12.5)  | 5<br>(9.6)   | 2<br>(4.8)   | 4<br>(6.7)   | 6<br>(11.5)  | 10<br>(16.1) | 7<br>(8.5)   | 10<br>(12.2) | 1.016<br>(0.956-1.080) | 0.618   |
| <b>K101EP</b>                                                       | 2<br>(16.7)  | 0<br>(0.0)  | 1<br>(5.0)   | 0<br>(0.0)   | 1<br>(5.9)   | 1<br>(10.0)  | 2<br>(8.0)   | 6<br>(10.9)  | 5<br>(10.6)  | 6<br>(10.7)  | 2<br>(3.8)   | 2<br>(4.8)   | 1<br>(1.7)   | 2<br>(3.8)   | 5<br>(8.1)   | 5<br>(6.1)   | 4<br>(4.9)   | 0.955<br>(0.891-1.025) | 0.202   |
| <b>Y181CIV</b>                                                      | 3<br>(25.0)  | 0<br>(0.0)  | 1<br>(5.0)   | 0<br>(0.0)   | 1<br>(5.9)   | 0<br>(0.0)   | 0<br>(0.0)   | 5<br>(9.1)   | 4<br>(8.5)   | 3<br>(5.4)   | 3<br>(5.8)   | 1<br>(2.4)   | 0<br>(0.0)   | 2<br>(3.8)   | 7<br>(11.3)  | 9<br>(11.0)  | 2<br>(2.4)   | 0.989<br>(0.917-1.066) | 0.770   |
| <b>NRTIs- Nucleoside reverse transcriptase inhibitors (n%)</b>      |              |             |              |              |              |              |              |              |              |              |              |              |              |              |              |              |              |                        |         |
| <b>M184VI</b>                                                       | 4<br>(33.3)  | 4<br>(66.7) | 6<br>(30.0)  | 1<br>(10.0)  | 3<br>(17.6)  | 0<br>(0.0)   | 2<br>(8.0)   | 7<br>(12.7)  | 5<br>(10.6)  | 2<br>(3.6)   | 3<br>(5.8)   | 0<br>(0.0)   | 5<br>(8.3)   | 6<br>(11.5)  | 11<br>(17.7) | 13<br>(15.9) | 25<br>(30.5) | 1.020<br>(0.967-1.075) | 0.473   |
| <b>M41L</b>                                                         | 4<br>(33.3)  | 2<br>(33.3) | 7<br>(35.0)  | 2<br>(20.0)  | 7<br>(41.2)  | 1<br>(10.0)  | 2<br>(8.0)   | 8<br>(14.5)  | 4<br>(8.5)   | 5<br>(8.9)   | 8<br>(15.4)  | 9<br>(21.4)  | 7<br>(11.7)  | 5<br>(9.6)   | 17<br>(27.4) | 14<br>(17.1) | 15<br>(18.3) | 0.978<br>(0.933-1.025) | 0.349   |
| <b>D67NGE</b>                                                       | 5<br>(41.7)  | 0<br>(0.0)  | 2<br>(10.0)  | 0<br>(0.0)   | 3<br>(17.6)  | 1<br>(10.0)  | 0<br>(0.0)   | 7<br>(12.7)  | 4<br>(8.5)   | 6<br>(10.7)  | 3<br>(5.8)   | 0<br>(0.0)   | 1<br>(1.7)   | 3<br>(5.8)   | 4<br>(6.5)   | 2<br>(2.4)   | 7<br>(8.5)   | 0.909<br>(0.850-0.971) | 0.005   |
| <b>T215<br/>YFISCDV<br/>E</b>                                       | 5<br>(41.7)  | 1<br>(16.7) | 3<br>(15.0)  | 1<br>(10.0)  | 5<br>(29.4)  | 0<br>(0.0)   | 0<br>(0.0)   | 2<br>(3.6)   | 1<br>(2.1)   | 0<br>(0.0)   | 1<br>(1.9)   | 0<br>(0.0)   | 1<br>(1.7)   | 2<br>(3.8)   | 6<br>(9.7)   | 3<br>(3.7)   | 11<br>(13.4) | 0.939<br>(0.874-1.008) | 0.084   |
| <b>L210W</b>                                                        | 2<br>(16.7)  | 1<br>(16.7) | 3<br>(15.0)  | 2<br>(20.0)  | 1<br>(5.9)   | 0<br>(0.0)   | 0<br>(0.0)   | 0<br>(0.0)   | 0<br>(0.0)   | 1<br>(1.8)   | 1<br>(1.9)   | 2<br>(4.8)   | 4<br>(6.7)   | 4<br>(7.7)   | 3<br>(4.8)   | 5<br>(6.1)   | 5<br>(6.1)   | 0.983<br>(0.906-1.067) | 0.687   |
| <b>K219QER<br/>N</b>                                                | 2<br>(16.7)  | 0<br>(0.0)  | 0<br>(0.0)   | 0<br>(0.0)   | 4<br>(23.5)  | 1<br>(10.0)  | 1<br>(4.0)   | 5<br>(9.1)   | 4<br>(8.5)   | 5<br>(8.9)   | 4<br>(7.7)   | 1<br>(2.4)   | 2<br>(3.3)   | 3<br>(5.8)   | 6<br>(9.7)   | 5<br>(6.1)   | 10<br>(12.2) | 1.005<br>(0.939-1.075) | 0.895   |
| <b>ART-Experienced Patients</b>                                     |              |             |              |              |              |              |              |              |              |              |              |              |              |              |              |              |              |                        |         |
| <b>PIs- Protease Inhibitors (n%)</b>                                |              |             |              |              |              |              |              |              |              |              |              |              |              |              |              |              |              |                        |         |

|                                                                      | 2001<br>(197) | 2002<br>(303) | 2003<br>(246) | 2004<br>(332) | 2005<br>(238) | 2006<br>(278) | 2007<br>(194) | 2008<br>(134) | 2009<br>(169) | 2010<br>(129) | 2011<br>(80) | 2012<br>(62) | 2013<br>(51) | 2014<br>(78) | 2015<br>(62) | 2016<br>(55) | 2017<br>(52) | OR (95%CI)             | P<br>trend |
|----------------------------------------------------------------------|---------------|---------------|---------------|---------------|---------------|---------------|---------------|---------------|---------------|---------------|--------------|--------------|--------------|--------------|--------------|--------------|--------------|------------------------|------------|
| <b>M46IL</b>                                                         | 46<br>(23.7)  | 66<br>(21.8)  | 40<br>(16.3)  | 33<br>(9.9)   | 30<br>(12.6)  | 42<br>(15.1)  | 27<br>(13.9)  | 13<br>(9.7)   | 16<br>(9.5)   | 9<br>(7.0)    | 8<br>(10.0)  | 2<br>(3.2)   | 3<br>(5.9)   | 7<br>(9.0)   | 7<br>(11.3)  | 2<br>(3.6)   | 7<br>(13.5)  | 0.912<br>(0.884-0.941) | <0.001     |
| <b>I54VLMT<br/>AS</b>                                                | 49<br>(25.3)  | 81<br>(26.7)  | 37<br>(15.0)  | 44<br>(13.3)  | 36<br>(15.1)  | 34<br>(12.2)  | 26<br>(13.4)  | 13<br>(9.7)   | 20<br>(11.8)  | 5<br>(3.9)    | 7<br>(8.8)   | 3<br>(4.8)   | 3<br>(5.9)   | 6<br>(7.7)   | 5<br>(8.1)   | 3<br>(5.5)   | 5<br>(9.6)   | 0.884<br>(0.856-0.913) | <0.001     |
| <b>V82ATSF</b>                                                       | 43<br>(22.2)  | 70<br>(23.1)  | 35<br>(14.2)  | 35<br>(10.5)  | 28<br>(11.8)  | 28<br>(10.1)  | 18<br>(9.3)   | 9<br>(6.7)    | 15<br>(8.9)   | 7<br>(5.4)    | 4<br>(5.0)   | 3<br>(4.8)   | 2<br>(3.9)   | 3<br>(3.8)   | 3<br>(4.8)   | 2<br>(3.6)   | 4<br>(7.7)   | 0.864<br>(0.833-0.897) | <0.001     |
| <b>L90M</b>                                                          | 69<br>(35.6)  | 97<br>(32.0)  | 49<br>(19.9)  | 52<br>(15.7)  | 41<br>(17.2)  | 37<br>(13.3)  | 26<br>(13.4)  | 13<br>(9.7)   | 10<br>(5.9)   | 6<br>(4.7)    | 8<br>(10.0)  | 4<br>(6.5)   | 6<br>(11.8)  | 5<br>(6.4)   | 5<br>(8.1)   | 3<br>(5.5)   | 4<br>(7.7)   | 0.844<br>(0.816-0.872) | <0.001     |
| <b>NNRTIs- Non-nucleoside reverse transcriptase inhibitors (n/%)</b> |               |               |               |               |               |               |               |               |               |               |              |              |              |              |              |              |              |                        |            |
| <b>K103NS</b>                                                        | 53<br>(27.3)  | 83<br>(27.4)  | 80<br>(32.5)  | 131<br>(39.5) | 111<br>(46.6) | 119<br>(42.8) | 94<br>(48.5)  | 52<br>(38.8)  | 74<br>(43.8)  | 46<br>(35.7)  | 24<br>(30.0) | 25<br>(40.3) | 20<br>(39.2) | 25<br>(32.1) | 23<br>(37.1) | 18<br>(32.7) | 24<br>(46.2) | 1.023<br>(1.004-1.042) | 0.020      |
| <b>Y181CIV</b>                                                       | 37<br>(19.1)  | 32<br>(10.6)  | 44<br>(17.9)  | 47<br>(14.2)  | 32<br>(13.4)  | 38<br>(13.7)  | 18<br>(9.3)   | 19<br>(14.2)  | 14<br>(8.3)   | 27<br>(20.9)  | 12<br>(15.0) | 6<br>(9.7)   | 3<br>(5.9)   | 22<br>(28.2) | 6<br>(9.7)   | 10<br>(18.2) | 9<br>(17.3)  | 1.005<br>(0.979-1.031) | 0.728      |
| <b>G190ASE</b>                                                       | 24<br>(12.4)  | 35<br>(11.6)  | 37<br>(15.0)  | 38<br>(11.4)  | 39<br>(16.4)  | 46<br>(16.5)  | 26<br>(13.4)  | 19<br>(14.2)  | 22<br>(13.0)  | 16<br>(12.4)  | 10<br>(12.5) | 6<br>(9.7)   | 7<br>(13.7)  | 10<br>(12.8) | 7<br>(11.3)  | 10<br>(18.2) | 4<br>(7.7)   | 0.997<br>(0.970-1.024) | 0.819      |
| <b>K101PEH</b>                                                       | 18<br>(9.3)   | 20<br>(6.6)   | 20<br>(8.1)   | 27<br>(8.1)   | 21<br>(8.8)   | 27<br>(9.7)   | 20<br>(10.3)  | 13<br>(9.7)   | 17<br>(10.1)  | 7<br>(5.4)    | 5<br>(6.3)   | 3<br>(4.8)   | 1<br>(2.0)   | 3<br>(3.8)   | 5<br>(8.1)   | 8<br>(14.5)  | 1<br>(1.9)   | 0.983<br>(0.949-1.017) | 0.314      |
| <b>NRTIs- Nucleoside reverse transcriptase inhibitors (n/%)</b>      |               |               |               |               |               |               |               |               |               |               |              |              |              |              |              |              |              |                        |            |
| <b>M41L</b>                                                          | 76<br>(39.2)  | 119<br>(39.3) | 80<br>(32.5)  | 85<br>(25.6)  | 64<br>(26.9)  | 62<br>(22.3)  | 38<br>(19.6)  | 18<br>(13.4)  | 27<br>(16.0)  | 6<br>(4.7)    | 8<br>(10.0)  | 8<br>(12.9)  | 4<br>(7.8)   | 5<br>(6.4)   | 5<br>(8.1)   | 6<br>(10.9)  | 6<br>(11.5)  | 0.850<br>(0.827-0.874) | <0.001     |
| <b>D67NGE</b>                                                        | 75<br>(38.7)  | 112<br>(37.0) | 67<br>(27.2)  | 80<br>(24.1)  | 68<br>(28.6)  | 69<br>(24.8)  | 39<br>(20.1)  | 27<br>(20.1)  | 22<br>(13.0)  | 13<br>(10.1)  | 12<br>(15.0) | 4<br>(6.5)   | 9<br>(17.6)  | 9<br>(11.5)  | 6<br>(9.7)   | 5<br>(9.1)   | 8<br>(15.4)  | 0.882<br>(0.860-0.905) | <0.001     |
| <b>K70R</b>                                                          | 39<br>(20.1)  | 54<br>(17.8)  | 32<br>(13.0)  | 49<br>(14.8)  | 44<br>(18.5)  | 43<br>(15.5)  | 24<br>(12.4)  | 16<br>(11.9)  | 9<br>(5.3)    | 5<br>(3.9)    | 9<br>(811.3) | 2<br>(3.2)   | 3<br>(5.9)   | 2<br>(2.6)   | 3<br>(4.8)   | 5<br>(9.1)   | 5<br>(9.6)   | 0.901<br>(0.873-0.931) | <0.001     |
| <b>L210W</b>                                                         | 37<br>(19.1)  | 50<br>(16.5)  | 41<br>(16.7)  | 29<br>(8.7)   | 23<br>(9.7)   | 21<br>(7.6)   | 18<br>(9.3)   | 7<br>(5.2)    | 8<br>(4.7)    | 1<br>(0.8)    | 1<br>(1.3)   | 1<br>(1.6)   | 1<br>(2.0)   | 1<br>(1.3)   | 1<br>(1.6)   | 2<br>(3.6)   | 1<br>(1.9)   | 0.813<br>(0.776-0.852) | <0.001     |
| <b>T215YF</b>                                                        | 90<br>(46.4)  | 139<br>(45.9) | 93<br>(37.8)  | 96<br>(28.9)  | 73<br>(30.7)  | 57<br>(20.5)  | 41<br>(21.1)  | 22<br>(16.4)  | 23<br>(13.6)  | 9<br>(7.0)    | 11<br>(13.8) | 5<br>(8.1)   | 4<br>(7.8)   | 6<br>(7.7)   | 4<br>(6.5)   | 3<br>(5.5)   | 8<br>(15.4)  | 0.824<br>(0.801-0.847) | <0.001     |
| <b>K219QE</b>                                                        | 58<br>(29.9)  | 76<br>(25.1)  | 57<br>(23.2)  | 55<br>(16.6)  | 59<br>(24.8)  | 52<br>(18.7)  | 40<br>(20.6)  | 22<br>(16.4)  | 15<br>(8.9)   | 10<br>(7.8)   | 10<br>(12.5) | 5<br>(8.1)   | 4<br>(7.8)   | 11<br>(14.1) | 12<br>(19.4) | 13<br>(23.6) | 9<br>(17.3)  | 0.935<br>(0.911-0.959) | <0.001     |
| <b>M184IV</b>                                                        | 129<br>(66.5) | 185<br>(61.1) | 159<br>(64.6) | 220<br>(66.3) | 160<br>(67.2) | 199<br>(71.6) | 136<br>(70.1) | 93<br>(69.4)  | 107<br>(63.3) | 78<br>(60.5)  | 47<br>(58.8) | 38<br>(61.3) | 34<br>(68.6) | 51<br>(65.4) | 40<br>(66.1) | 39<br>(70.9) | 29<br>(55.8) | 0.995<br>(0.976-1.015) | 0.639      |
| <b>L74IV</b>                                                         | 13<br>(6.7)   | 20<br>(6.6)   | 18<br>(7.3)   | 17<br>(5.1)   | 9<br>(3.8)    | 19<br>(6.8)   | 8<br>(4.1)    | 8<br>(6.0)    | 8<br>(4.7)    | 6<br>(4.7)    | 4<br>(5.0)   | 1<br>(1.6)   | 2<br>(3.9)   | 6<br>(7.7)   | 2<br>(3.2)   | 6<br>(10.9)  | 2<br>(3.8)   | 0.982<br>(0.942-1.023) | 0.379      |

**Table S4-** Univariate analysis of factors associated with HIV transmitted drug resistance. TDR, transmitted drug resistance; NRTI, Nucleotide reverse transcriptase inhibitors; NNRTI, Non-nucleotide reverse transcriptase inhibitors; PI, Protease inhibitors; CI, confidence interval; OR, odds ratio.

| Variable                           | Any TDR     |                  |       | NRTI TDR    |                  |       | NNRTI TDR   |                  |       | PI TDR      |                  |        |
|------------------------------------|-------------|------------------|-------|-------------|------------------|-------|-------------|------------------|-------|-------------|------------------|--------|
|                                    | n (%)       | OR (95%CI)       | p     | n (%)       | OR (95%CI)       | p     | n (%)       | OR (95%CI)       | p     | n (%)       | OR (95%CI)       | p      |
| <b>Sex</b>                         |             |                  |       |             |                  |       |             |                  |       |             |                  |        |
| Female *                           | 215 (31.2%) |                  |       | 92 (31.8%)  |                  |       | 135 (36.8%) |                  |       | 50 (24.3%)  |                  |        |
| Male                               | 467 (67.7%) | 1.18 (0.99-1.40) | 0.058 | 193 (66.8%) | 1.13 (0.87-1.45) | 0.359 | 228 (62.1%) | 0.90 (0.72-1.12) | 0.331 | 155 (75.2%) | 1.68 (1.22-2.32) | 0.002  |
| <b>Age at diagnosis</b>            |             |                  |       |             |                  |       |             |                  |       |             |                  |        |
| 18-25*                             | 68 (9.9%)   |                  |       | 22 (7.6%)   |                  |       | 38 (10.4%)  |                  |       | 19 (9.2%)   |                  |        |
| 26-40                              | 291 (42.2%) | 1.00 (0.76-1.32) | 0.983 | 108 (37.4%) | 1.15 (0.72-1.83) | 0.559 | 151 (41.1%) | 0.92 (0.64-1.33) | 0.665 | 93 (45.1%)  | 1.14 (0.69-1.89) | 0.596  |
| 41-55                              | 223 (32.3%) | 1.12 (0.84-1.49) | 0.428 | 110 (38.1%) | 1.73 (1.08-2.75) | 0.021 | 114 (31.1%) | 1.02 (0.70-1.48) | 0.933 | 60 (29.1%)  | 1.07 (0.64-1.81) | 0.798  |
| >56                                | 80 (11.6%)  | 1.08 (0.77-1.51) | 0.671 | 29 (10.0%)  | 1.20 (0.69-2.12) | 0.517 | 44 (12.0%)  | 1.06 (0.68-1.65) | 0.814 | 29 (14.1%)  | 1.40 (0.78-2.52) | 0.261  |
| <b>Risk groups</b>                 |             |                  |       |             |                  |       |             |                  |       |             |                  |        |
| Heterosexuals*                     | 38 (5.5%)   |                  |       | 17 (5.9%)   |                  |       | 23 (6.3%)   |                  |       | 11 (5.3%)   |                  |        |
| MSM                                | 18 (2.6%)   | 0.87 (0.48-1.56) | 0.633 | 6 (2.1%)    | 0.64 (0.25-1.66) | 0.362 | 6 (1.6%)    | 0.47 (0.19-1.17) | 0.104 | 8 (3.9%)    | 1.36 (0.54-3.45) | 0.512  |
| IVDU                               | 19 (2.8%)   | 0.94 (0.53-1.68) | 0.838 | 9 (3.1%)    | 1.00 (0.44-2.30) | 0.994 | 9 (2.5%)    | 0.73 (0.33-1.61) | 0.432 | 6 (2.9%)    | 1.03 (0.38-2.84) | 0.948  |
| Others                             | 5 (0.7%)    | 0.58 (0.22-1.52) | 0.264 | 3 (1.0%)    | 0.80 (0.23-2.80) | 0.730 | 1 (0.3%)    | 0.19 (0.02-1.42) | 0.106 | 3 (1.5%)    | 1.26 (0.24-4.63) | 0.726  |
| <b>Geographic region of origin</b> |             |                  |       |             |                  |       |             |                  |       |             |                  |        |
| Portugal*                          | 249 (36.1%) |                  |       | 98 (33.9%)  |                  |       | 121 (33.0%) |                  |       | 95 (46.1%)  |                  |        |
| Europe                             | 5 (0.7%)    | 0.60 (0.24-1.51) | 0.280 | 4 (1.4%)    | 1.29 (0.46-3.60) | 0.624 | 2 (0.5%)    | 0.50 (0.12-2.08) | 0.344 | 0 (0.0%)    | -----            | -----  |
| Sub-Saharan Africa                 | 88 (12.8%)  | 0.91 (0.71-1.18) | 0.489 | 45 (15.6%)  | 1.21 (0.84-1.73) | 0.307 | 11 (3.0%)   | 1.31 (0.95-1.80) | 0.094 | 10 (4.9%)   | 0.27 (0.14-0.51) | <0.001 |

| Variable                                       | Any TDR     |                  |        | NRTI TDR    |                  |        | NNRTI TDR   |                  |       | PI TDR      |                   |        |
|------------------------------------------------|-------------|------------------|--------|-------------|------------------|--------|-------------|------------------|-------|-------------|-------------------|--------|
|                                                | n (%)       | OR (95%CI)       | p      | n (%)       | OR (95%CI)       | p      | n (%)       | OR (95%CI)       | p     | n (%)       | OR (95%CI)        | p      |
| South America                                  | 20 (2.9%)   | 1.01 (0.63-1.64) | 0.953  | 6 (2.1)     | 0.76 (0.33-1.77) | 0.531  | 11 (3.0%)   | 1.16 (0.61-2.18) | 0.656 | 1 (0.5%)    | 0.52 (0.19-1.43)  | 0.207  |
| <b>Subtypes</b>                                |             |                  |        |             |                  |        |             |                  |       |             |                   |        |
| B*                                             | 304 (44.1%) |                  |        | 141 (48.8%) |                  |        | 129 (35.1%) |                  |       | 105 (51.0%) |                   |        |
| Non-B                                          | 240 (34.8%) | 0.70 (0.59-0.84) | <0.001 | 78 (27.0%)  | 0.50 (0.37-0.66) | <0.001 | 164 (44.7%) | 1.18 (0.93-1.49) | 0.173 | 62 (30.1%)  | 0.53 (0.389-0.73) | <0.001 |
| <b>CD4 (cells/mL)</b>                          |             |                  |        |             |                  |        |             |                  |       |             |                   |        |
| <50*                                           | 36 (5.2%)   |                  |        | 18 (6.2%)   |                  |        | 20 (5.4%)   |                  |       | 10 (4.9%)   |                   |        |
| 51-200                                         | 63 (9.1%)   | 0.95 (0.62-1.46) | 0.810  | 23 (8.0%)   | 0.69 (0.37-1.29) | 0.241  | 40 (10.9%)  | 1.09 (0.63-1.90) | 0.749 | 15 (7.3%)   | 0.81 (0.36-1.83)  | 0.617  |
| 201-350                                        | 72 (10.4%)  | 1.03 (0.68-1.57) | 0.885  | 29 (10.0%)  | 0.82 (0.45-1.50) | 0.523  | 39 (10.6%)  | 1.00 (0.58-1.74) | 0.992 | 22 (10.7%)  | 1.14 (0.53-2.42)  | 0.743  |
| 351-500                                        | 75 (10.9%)  | 1.20 (0.79-1.81) | 0.399  | 23 (8.0%)   | 0.71 (0.38-1.34) | 0.291  | 45 (12.3%)  | 1.29 (0.75-2.21) | 0.357 | 27 (13.1%)  | 1.54 (0.74-3.22)  | 0.247  |
| >501                                           | 100 (14.5%) | 1.27 (0.85-1.89) | 0.241  | 39 (13.5%)  | 0.97 (0.55-1.71) | 0.907  | 49 (13.4%)  | 1.10 (0.64-1.88) | 0.727 | 33 (16.0%)  | 1.49 (0.73-3.06)  | 0.247  |
| <b>Viral Load (log<sub>10</sub> copies/ml)</b> |             |                  |        |             |                  |        |             |                  |       |             |                   |        |
| < 4.0*                                         | 128 (18.6%) |                  |        | 65 (22.5%)  |                  |        | 76 (20.7%)  |                  |       | 41 (19.9%)  |                   |        |
| 4.1 to 5.0                                     | 216 (31.3%) | 0.78 (0.62-0.98) | 0.032  | 80 (27.7%)  | 0.57 (0.40-0.79) | 0.001  | 112 (30.5%) | 0.68 (0.50-0.92) | 0.012 | 71 (34.5%)  | 0.81 (0.55-1.20)  | 0.296  |
| >5.1                                           | 176 (25.5%) | 0.67 (0.53-0.86) | 0.001  | 64 (22.1%)  | 0.48 (0.34-0.69) | <0.001 | 91 (24.8%)  | 0.59 (0.43-0.81) | 0.001 | 46 (22.3%)  | 0.56 (0.37-0.86)  | 0.008  |

\* Reference category

**Table S5-** Association for the most prevalent drug-resistance mutation for each major drug class: M184V, L90M, and K103N for NRTI, PI, and NNRTI with viral load for ART-NP. CI, confidence interval; OR, odds ratio; ART-NP, Antiretroviral Naïve Patients

| Variable                                        | M184V            |        | K103NS           |       | L90M             |       |
|-------------------------------------------------|------------------|--------|------------------|-------|------------------|-------|
|                                                 | OR (95%CI)       | p      | OR (95%CI)       | p     | OR (95%CI)       | p     |
| <b>Viral Load</b> (log <sub>10</sub> copies/ml) |                  |        |                  |       |                  |       |
| < 4.0*                                          |                  |        |                  |       |                  |       |
| 4.1 to 5.0                                      | 0.30 (0.17-0.54) | <0.001 | 0.76 (0.51-1.12) | 0.164 | 0.64 (0.35-1.16) | 0.145 |
| >5.1                                            | 0.15 (0.07-0.33) | <0.001 | 0.62 (0.41-0.94) | 0.023 | 0.40 (0.20-0.78) | 0.008 |

\* Reference category

**Table S6-** Univariate analysis of factors associated with HIV acquired drug resistance. ADR, acquired drug resistance; NRTI, Nucleotide reverse transcriptase inhibitors; NNRTI, Non-nucleotide reverse transcriptase inhibitors; PI, Protease inhibitors; CI, confidence interval; OR, odds ratio.

| Variable                           | Any ADR      |                  |        | NRTI ADR     |                  |        | NNRTI ADR    |                  |       | PI ADR      |                  |        |
|------------------------------------|--------------|------------------|--------|--------------|------------------|--------|--------------|------------------|-------|-------------|------------------|--------|
|                                    | n (%)        | OR (95%CI)       | p      | n (%)        | OR (95%CI)       | p      | n (%)        | OR (95%CI)       | p     | n (%)       | OR (95%CI)       | p      |
| <b>Sex</b>                         |              |                  |        |              |                  |        |              |                  |       |             |                  |        |
| Female *                           | 787 (29.7%)  |                  |        | 641 (22.8%)  |                  |        | 538 (30.5%)  |                  |       | 208 (22.9%) |                  |        |
| Male                               | 1861 (70.0%) | 1.45 (1.27-1.70) | <0.001 | 1575 (70.8%) | 1.45 (1.26-1.66) | <0.001 | 1217 (69.0%) | 1.16 (1.01-1.33) | 0.036 | 699 (76.9%) | 1.83 (1.54-2.18) | <0.001 |
| <b>Age at diagnosis</b>            |              |                  |        |              |                  |        |              |                  |       |             |                  |        |
| 18-25*                             | 89 (3.3%)    |                  |        | 18 (2.0%)    |                  |        | 67 (3.8%)    |                  |       | 18 (2.0%)   |                  |        |
| 26-40                              | 1336 (50.3%) | 1.62 (1.15-2.26) | 0.005  | 443 (48.7%)  | 1.44 (1.04-2.00) | 0.030  | 886 (50.3%)  | 1.09 (0.78-1.52) | 0.613 | 443 (48.7%) | 2.23 (1.35-3.70) | 0.002  |
| 41-55                              | 937 (35.3%)  | 1.57 (1.12-2.21) | 0.009  | 332 (36.5%)  | 1.45 (1.04-2.03) | 0.029  | 621 (35.2%)  | 1.07 (0.76-1.50) | 0.694 | 332 (36.5%) | 2.41 (1.45-4.00) | 0.001  |
| >56                                | 252 (9.5%)   | 2.06 (1.38-3.08) | <0.001 | 103 (11.3%)  | 1.93 (1.31-2.84) | 0.001  | 160 (9.1%)   | 1.14 (0.78-1.68) | 0.501 | 103 (11.3%) | 3.26 (1.89-5.61) | <0.001 |
| <b>Risk groups</b>                 |              |                  |        |              |                  |        |              |                  |       |             |                  |        |
| Heterosexuals*                     | 139 (5.2%)   |                  |        | 74 (3.3%)    |                  |        | 83 (4.7%)    |                  |       | 56 (6.2%)   |                  |        |
| MSM                                | 42 (1.6%)    | 0.47 (0.26-0.85) | 0.013  | 1108 (49.8%) | 0.38 (0.22-0.67) | 0.001  | 27 (1.5%)    | 0.76 (0.43-1.33) | 0.339 | 13 (1.4%)   | 0.52 (0.26-1.02) | 0.058  |
| IVDU                               | 139 (5.2%)   | 1.24 (0.74-2.06) | 0.416  | 787 (35.4%)  | 1.15 (0.74-1.81) | 0.532  | 96 (5.4%)    | 1.47 (0.97-2.24) | 0.070 | 48 (5.3%)   | 0.86 (0.54-1.36) | 0.510  |
| Others                             | 78 (2.9%)    | 0.84 (0.48-1.46) | 0.541  | 219 (9.8%)   | 0.85 (0.52-1.41) | 0.531  | 51 (2.9%)    | 1.10 (0.68-1.77) | 0.712 | 32 (3.5%)   | 0.96 (0.57-1.62) | 0.894  |
| <b>Geographic region of origin</b> |              |                  |        |              |                  |        |              |                  |       |             |                  |        |
| Portugal*                          | 711 (26.8%)  |                  |        | 564 (25.3%)  |                  |        | 472 (26.8%)  |                  |       | 244 (26.8%) |                  |        |
| Europe                             | 5 (0.2%)     | 0.21 (0.08-0.57) | 0.002  | 4 (0.2%)     | 0.26 (0.09-0.78) | 0.017  | 4 (0.2%)     | 0.36 (0.12-1.08) | 0.069 | 1 (0.1%)    | 0.20 (0.03-1.47) | 0.113  |

| Variable                                       | Any ADR      |                  |        | NRTI ADR     |                  |        | NNRTI ADR   |                  |       | PI ADR      |                  |        |
|------------------------------------------------|--------------|------------------|--------|--------------|------------------|--------|-------------|------------------|-------|-------------|------------------|--------|
|                                                | n (%)        | OR (95%CI)       | p      | n (%)        | OR (95%CI)       | p      | n (%)       | OR (95%CI)       | p     | n (%)       | OR (95%CI)       | p      |
| Sub-Saharan Africa                             | 263 (9.9%)   | 1.00 (0.79-1.25) | 0.963  | 212 (9.5%)   | 1.03 (0.82-1.28) | 0.807  | 191 (10.8%) | 1.17 (0.93-1.46) | 0.179 | 59 (6.5%)   | 0.60 (0.44-0.81) | 0.001  |
| South America                                  | 30 (1.1%)    | 1.16 (0.63-2.16) | 0.632  | 25 (1.1)     | 1.24 (0.69-2.24) | 0.474  | 20 (1.1%)   | 1.11 (0.61-2.01) | 0.735 | 6 (0.7)     | 0.56 (0.23-1.33) | 0.189  |
| <b>Subtypes</b>                                |              |                  |        |              |                  |        |             |                  |       |             |                  |        |
| B*                                             | 1207 (45.4%) |                  |        | 1055 (47.4%) |                  |        | 767 (43.5%) |                  |       | 473 (52.0%) |                  |        |
| Non-B                                          | 1020 (38.4%) | 0.70 (0.60-0.82) | <0.001 | 819 (36.8%)  | 0.63 (0.55-0.73) | <0.001 | 715 (40.6%) | 0.99 (0.86-1.14) | 0.862 | 316 (34.8%) | 0.64 (0.54-0.75) | <0.001 |
| <b>CD4 (cells/mL)</b>                          |              |                  |        |              |                  |        |             |                  |       |             |                  |        |
| <50*                                           | 214 (8.1%)   |                  |        | 166 (7.5%)   |                  |        | 162 (9.2%)  |                  |       | 64 (7.0%)   |                  |        |
| 51-200                                         | 572 (21.5%)  | 0.85 (0.64-1.12) | 0.252  | 471 (21.2%)  | 1.02 (0.78-1.32) | 0.912  | 399 (22.6%) | 0.77 (0.59-1.00) | 0.046 | 153 (16.8%) | 0.82 (0.59-1.13) | 0.221  |
| 201-350                                        | 545 (20.5%)  | 0.88 (0.66-1.17) | 0.376  | 448 (20.1%)  | 1.04 (0.80-1.35) | 0.778  | 358 (20.3%) | 0.70 (0.54-0.91) | 0.009 | 192 (21.1%) | 1.17 (0.85-1.61) | 0.332  |
| 351-500                                        | 392 (14.8%)  | 1.22 (0.90-1.66) | 0.206  | 328 (14.7%)  | 1.37 (1.03-1.82) | 0.030  | 259 (14.7%) | 0.85 (0.64-1.13) | 0.263 | 139 (15.3%) | 1.34 (0.96-1.88) | 0.084  |
| >501                                           | 402 (15.1%)  | 1.08 (0.80-1.47) | 0.605  | 356 (16.0%)  | 1.46 (1.10-1.93) | 0.009  | 252 (14.3%) | 0.73 (0.55-0.96) | 0.024 | 156 (17.2%) | 1.45 (1.04-2.02) | 0.027  |
| <b>Viral Load (log<sub>10</sub> copies/ml)</b> |              |                  |        |              |                  |        |             |                  |       |             |                  |        |
| < 4.0*                                         | 1164 (43.8%) |                  |        | 1023(46.0%)  |                  |        | 742 (42.1%) |                  |       | 410 (45.1%) |                  |        |
| 4.1 to 5.0                                     | 850 (32.0%)  | 0.70 (0.59-0.83) | <0.001 | 706 (31.7%)  | 0.67 (0.57-0.78) | <0.001 | 573 (32.5%) | 0.93 (0.80-1.08) | 0.315 | 302 (33.2%) | 0.89(0.75-1.06)  | 0.179  |
| >5.1                                           | 346 (13.0%)  | 0.39 (0.32-0.48) | <0.001 | 247 (11.1%)  | 0.33 (0.27-0.40) | <0.001 | 257 (14.6%) | 0.75 (0.62-0.90) | 0.003 | 96 (10.6%)  | 0.50 (0.39-0.64) | <0.001 |

\* Reference category
